# Supplementary material for: In Vitro Antimicrobial Activity of Thymus vulgaris, Origanum vulgare, Satureja montana and Their Mixture against Clinical Isolates Responsible for Canine Otitis Externa
Source: MDPI journal article supplement (doi:10.3390/vetsci10010030), 2023-01-01
Supplement: s1 [file s1]

## SUPPLEMENTARY MATERIALS

**Table S1.** Antimicrobial resistance profiles for each examined Gram-positive isolate.

| Identification number of the isolate | Bacterial species                       | Antimicrobial resistance profile           |
|--------------------------------------|-----------------------------------------|--------------------------------------------|
| T10                                  | <i>Staphylococcus aureus</i>            | AMP                                        |
| T20                                  | <i>Staphylococcus aureus</i>            | AMP, DA, DO, TE, TOB, SXT, ENR             |
| T33 G                                | <i>Staphylococcus aureus</i>            | AMP, DA, TE, TOB, AK, ENR                  |
| T39                                  | <i>Staphylococcus aureus</i>            | AMP, DA, DO, TOB, AK, RD                   |
| T42                                  | <i>Staphylococcus aureus</i>            | AMP, TOB, RD                               |
| 248                                  | <i>Staphylococcus aureus</i>            | DO, TE, TOB, CN, SXT, ENR                  |
| 501                                  | <i>Staphylococcus aureus</i>            | AMP, DA, ENR                               |
| 387                                  | <i>Staphylococcus aureus</i>            | AMP, DA, TE, TOB, CN                       |
| T15                                  | <i>Staphylococcus auricularis</i>       | AMP                                        |
| T32                                  | <i>Staphylococcus capitis</i>           | AMP                                        |
| 530 A                                | <i>Staphylococcus capitis</i>           | AMP                                        |
| T11                                  | <i>Staphylococcus chromogenes</i>       | DO, TOB, AK, RD                            |
| T3                                   | <i>Staphylococcus epidermidis</i>       | AMP, AMC, TOB                              |
| T22                                  | <i>Staphylococcus epidermidis</i>       | AMP, TOB, CN, SXT                          |
| T26                                  | <i>Staphylococcus epidermidis</i>       | AMP, DO, TE, TOB                           |
| T28                                  | <i>Staphylococcus hominis</i>           | AMP, DO, TE                                |
| T53                                  | <i>Staphylococcus pseudointermedius</i> | DA                                         |
| T33 P                                | <i>Staphylococcus lugdunensis</i>       | DO, TOB, AK                                |
| T27                                  | <i>Staphylococcus simulans</i>          | AMP, DA, DO, TE, TOB, CN, AK, SXT, RD, ENR |
| T31 G                                | <i>Staphylococcus simulans</i>          | AMP, DA, DO, TOB, CN, AK, SXT, RD, ENR     |
| 208 A                                | <i>Staphylococcus xylosus</i>           | AMP, AMC, DA, DO, TE, TOB, CN, RD, ENR     |
| 234 2A                               | <i>Staphylococcus xylosus</i>           | AMP, DO, TE, TOB, CN                       |
| T54                                  | <i>Streptococcus constellatus</i>       | TE                                         |

Legend. AK = amikacin; AMC = amoxycillin and clavulanic acid; AMP = ampicillin; DA = clindamycin; DO = doxycycline; ENR = enrofloxacin; CN = gentamicin; RD = rifampicin; SXT = trimethoprim–sulfamethoxazole; TE = tetracycline; and TOB = tobramycin.

**Table S2.** Antimicrobial resistance profiles for each examined Enterobacteriaceae isolate.

| Identification number of the isolate | Bacterial species            | Antimicrobial resistance profile            |
|--------------------------------------|------------------------------|---------------------------------------------|
| 33 B                                 | <i>Escherichia coli</i>      | DA, RD                                      |
| 198                                  | <i>Escherichia coli</i>      | AMP, DA, DO, TE, CN, SXT, RD                |
| 502 B                                | <i>Escherichia coli</i>      | DA, DO, TE, RD                              |
| 856 A1                               | <i>Escherichia coli</i>      | AMP, DA, SXT, RD                            |
| 857 B1                               | <i>Escherichia coli</i>      | AMP, DA, SXT, RD                            |
| 858 A                                | <i>Escherichia coli</i>      | AMP, DA, RD                                 |
| 220 B                                | <i>Klebsiella pneumoniae</i> | AMP, AMC, DA, DO, TE, RD                    |
| 100                                  | <i>Serratia marcescens</i>   | AMP, AMC, DA, DO, TE, TOB, CN, SXT, RD, ENR |

Legend. AK = amikacin; AMC = amoxycillin and clavulanic acid; AMP = ampicillin; DA = clindamycin; DO = doxycycline; ENR = enrofloxacin; CN = gentamicin; RD = rifampicin; SXT = trimethoprim-sulfamethoxazole; TE = tetracycline; and TOB = tobramycin.

**Table S3.** Antimicrobial resistance profiles for each examined *Pseudomonas aeruginosa* isolate.

| Identification number of the isolate | Bacterial species             | Antimicrobial resistance profile                |
|--------------------------------------|-------------------------------|-------------------------------------------------|
| 178                                  | <i>Pseudomonas aeruginosa</i> | AMP, AMC, DA, DO,TE, SXT, RD, ENR               |
| 348 B                                | <i>Pseudomonas aeruginosa</i> | AMP, AMC, DA, DO, TE, AK, SXT, RD               |
| 389                                  | <i>Pseudomonas aeruginosa</i> | AMP, AMC, DA, DO, TE, SXT, RD, ENR              |
| 417                                  | <i>Pseudomonas aeruginosa</i> | AMP, AMC, DA, DO, TE, SXT, RD, ENR              |
| 465                                  | <i>Pseudomonas aeruginosa</i> | AMP, AMC, DA, DO, TE, CN, SXT, RD, ENR          |
| 502 A                                | <i>Pseudomonas aeruginosa</i> | AMP, AMC, DA, DO, TE, SXT, RD, ENR              |
| 535 A                                | <i>Pseudomonas aeruginosa</i> | AMP, AMC, DA, DO, TE, CN, AK, SXT, RD, ENR      |
| 768                                  | <i>Pseudomonas aeruginosa</i> | AMP, AMC, DA, DO, TE, TOB, CN, AK, SXT, RD, ENR |
| 822 A1                               | <i>Pseudomonas aeruginosa</i> | AMP, AMC, DA, DO, TE, TOB, SXT, RD, ENR         |
| 856 A2                               | <i>Pseudomonas aeruginosa</i> | AMP, AMC, DA, DO, TE, SXT, RD, ENR              |
| 857 B2                               | <i>Pseudomonas aeruginosa</i> | AMP, AMC, DA, DO, TE, SXT, RD, ENR              |
| 858 B                                | <i>Pseudomonas aeruginosa</i> | AMP, AMC, DA, DO, TE, SXT, RD                   |
| 875 B1                               | <i>Pseudomonas aeruginosa</i> | AMP, AMC, DA, SXT, RD                           |
| 876 A                                | <i>Pseudomonas aeruginosa</i> | AMP, AMC, DA, DO, TE, SXT, RD, ENR              |
| 876 B2                               | <i>Pseudomonas aeruginosa</i> | AMP, AMC, DA, DO, TE, TOB, AK, RD               |
| 1034                                 | <i>Pseudomonas aeruginosa</i> | AMP, AMC, DA, DO, TE, CN, SXT, RD               |

Legend. AK = amikacin; AMC = amoxycillin and clavulanic acid; AMP = ampicillin; DA = clindamycin; DO = doxycycline; ENR = enrofloxacin; CN = gentamicin; RD = rifampicin; SXT = trimethoprim–sulfamethoxazole; TE = tetracycline; and TOB = tobramycin.
